# Supplementary material for: Assessment of self-medication practices in the context of the COVID-19 outbreak in Togo
Source: BMC Public Health. 2021 Jan 6;21:58. doi: 10.1186/s12889-020-10145-1 (PMC7787400; doi:10.1186/s12889-020-10145-1)
Supplement: Supplementary file 1 — Additional file 1. Surveillance Survey of SARS-CoV-2 Infection in Populations at Risk of Lomé-Commune in 2020: Survey sheet. This is a questionnaire developed for data collection for this study. The file is made up of two parts, an information and contact details part and a survey form part. [file 12889_2020_10145_MOESM1_ESM.pdf]

## Information and contact details

First name: .....

Last Name: .....

Phone number 1: .....

Phone number 2: .....

Address: .....

.....

Laboratory ID: | S | R | A | S | | | | |

Participant ID: | | | | | | | | | | | | |

(Participant ID: First 3 letters Last name then first 3 letters First name, Sex (M/F), Year of birth)

***NB: The Participant ID must be identical to the one reported on the survey form***

### Contact persons

First name: .....

Last name: .....

Family Relationship: .....

Phone number: .....

First name: .....

Last name: .....

Family Relationship: .....

Phone number: .....

**Important: This sheet "Information and contact details" is to be detached from the survey sheet after completion and to be kept under lock and key!**

## Survey Sheet

Inclusion date: |\_\_| |\_\_| | / |\_\_| |\_\_| | / |\_\_| |\_\_| |\_\_| |\_\_|

Laboratory ID: |\_S\_|\_|A\_|\_|R\_|\_|S\_|\_| |\_\_| |\_\_| |\_\_| |\_\_|

Participant ID: |\_\_| |\_\_| |\_\_| |\_\_| |\_\_| |\_\_| |\_\_| |\_\_| |\_\_| |\_\_|

(Participant ID: First 3 letters Last name then first 3 letters First name, Sex (M/F), Year of birth)

Inclusion place: .....

Investigator ID: .....

### 1. Sociodemographic characteristics

Q101. Age (years): |\_\_| |\_\_|

Q102. Gender: ☐ Male<sup>1</sup> ☐ Female<sup>2</sup>

Q103. Nationality: ☐ Togolese<sup>1</sup> ☐ Others<sup>2</sup> (Specify): .....

Q104. Profession: ☐ Airport professionals<sup>1</sup> ☐ Customs<sup>2</sup> ☐ Taxi driver<sup>3</sup> ☐ Moto taxi driver<sup>4</sup> ☐ Health professional<sup>5</sup>

☐ Merchants<sup>6</sup> ☐ Patient<sup>7</sup> ☐ Hotel professional<sup>8</sup> ☐ Other<sup>9</sup>: .....

*If health professional*

Q104.1. Function: ☐ Physician<sup>1</sup> ☐ Medical assistant<sup>2</sup> ☐ Nurse<sup>3</sup> ☐ Midwife<sup>4</sup> ☐ Pharmacy auxiliaries<sup>5</sup>

☐ Other<sup>9</sup>: .....

Q104.2. Exercice place : ☐ CHU Campus<sup>1</sup> ☐ Clinique Biasa<sup>2</sup> ☐ Clinique l'espérance<sup>3</sup> ☐ Clinique Autel d'Elie<sup>4</sup>

☐ CHU Sylvanus Olympio<sup>5</sup> ☐ Others<sup>6</sup> (Specify): .....

Q105. Marital status : ☐ Single<sup>1</sup> ☐ Married<sup>2</sup> ☐ Divorced<sup>3</sup> ☐ Widowed<sup>4</sup>

Q106. Study level: ☐ Out of school<sup>0</sup> ☐ Primary<sup>1</sup> ☐ Secondary<sup>2</sup> ☐ Superior<sup>3</sup>

### 2. Epidemiological link

Q201. Concept of travel outside Togo in the last two months: ☐ Yes<sup>1</sup> ☐ No<sup>0</sup>

Q201.1. If yes, date of return to Togo: |\_\_| |\_\_| | / |\_\_| |\_\_| | / |\_\_| |\_\_| |\_\_| |\_\_|

Q202. Concept of contact with an infected person: ☐ Yes<sup>1</sup> ☐ No<sup>0</sup>

Q202.1. If Yes, link with this person: .....

Q203. BCG vaccination status: ☐ Vaccinated<sup>1</sup> ☐ Not vaccinated<sup>0</sup> ☐ Don't know<sup>99</sup>

Q204. How many people have you had contact with for 30 minutes or more in the past 48 hours? |\_\_| |\_\_|

Q205. How many people have you had contact with for 30 minutes or more in the past 48 hours without barrier measures? |\_\_| |\_\_|

Q206. How many people do you live with in your household? |\_\_| |\_\_|

Q207. How many people do you live with in your room? |\_\_| |\_\_|

### 3. Knowledge, Attitudes and Practices towards COVID-19

Q301. Have you ever heard of COVID-19? ☐ Yes<sup>1</sup> ☐ No<sup>0</sup>

Q301.1. If yes, how? ☐ Media<sup>1</sup> ☐ Word of mouth<sup>2</sup> ☐ Others<sup>3</sup> (Specify): .....

Q302. A person with the virus can infect others even if they do not have symptoms: ☐ True<sup>1</sup> ☐ False<sup>2</sup>

Q302. Concept of preventive self-medication against COVID-19

Q302.1. Taking Chloroquine / Hydroxychloroquine? ☐ Yes<sup>1</sup> ☐ No<sup>0</sup>

Q302.2. Taking azithromycin? ☐ Yes<sup>1</sup> ☐ No<sup>0</sup>

Q302.3. Taking traditional medicine preparation? :☐ Yes<sup>1</sup> ☐ No<sup>0</sup>

Q302.4. Daily vitamin C intake? ☐ Yes<sup>1</sup> ☐ No<sup>0</sup>

Q303. Protective measures used: ☐ Social distancing<sup>1</sup> ☐ Hand hygiene<sup>2</sup>

☐ Wearing a fabric mask<sup>3</sup> ☐ Wearing a surgical mask<sup>4</sup>

☐ FFP<sup>5</sup> mask port ☐ No protection<sup>0</sup>

### 4. Symptoms (If applicable)

Q401. Have you had in the past 15 days or are you currently experiencing any of the following signs?

☐ None <sup>0</sup> ☐ Fever<sup>1</sup> ☐ Headache<sup>2</sup> ☐ Joint / muscle pain (body aches) <sup>3</sup> ☐ Sore throat<sup>4</sup>

☐ Rhinorrhea<sup>5</sup> ☐ Breathing difficulties (shortness of breath) <sup>6</sup> ☐ Anosmia (difficulty perceiving odors) <sup>7</sup>

☐ Ageusia (difficulty perceiving the taste of food) <sup>8</sup> ☐ Abdominal pain<sup>9</sup> ☐ Diarrhea<sup>10</sup> ☐ Cough<sup>11</sup>

☐ Unusual fatigue<sup>12</sup> ☐ Others (Specify) <sup>13</sup>: .....

Q402. Start date of symptoms (DD-MM-YYYY): | \_\_\_\_ | \_\_\_\_ | - | \_\_\_\_ | \_\_\_\_ | - | \_\_\_\_ | \_\_\_\_ | \_\_\_\_ | \_\_\_\_ |

Q403. Temperature today (Degrees Celsius): | \_\_\_\_ | \_\_\_\_ | . | \_\_\_\_ |

Q404. Have you contacted a health professional since the onset of symptoms? ☐ Yes<sup>1</sup> ☐ No<sup>0</sup>

Q404.1. If yes to question 404, how? ☐ By calling "111" <sup>1</sup> ☐ By calling my attending physician<sup>2</sup>

☐ By going to a health center<sup>3</sup>

### 5. Biological examination

Q501. Date of collection (DD-MM-YYYY): | \_\_\_\_ | \_\_\_\_ | - | \_\_\_\_ | \_\_\_\_ | - | \_\_\_\_ | \_\_\_\_ | \_\_\_\_ | \_\_\_\_ |

Q501.1. PCR result: ☐ Negative<sup>0</sup> ☐ Positive<sup>1</sup> ☐ Doubtful<sup>2</sup>

Q501.2. RDT results: ☐ Absence of antibodies<sup>0</sup> ☐ IgG<sup>1</sup> ☐ IgM<sup>2</sup>
